# Supplementary material for: Proton transfer events in GFP
Source: Royal Society of Chemistry journal article supplement (doi:10.1039/c1cp20387h), 2011-01-01
Supplement: c1cp20387h.pdf [file c1cp20387h.pdf]

## **The pathway for proton transfer events in GFP**

Mariangela Di Donato, Luuk J.G.W. van Wilderen, Ivo H.M. Van Stokkum, Thomas Cohen

Stuart, John T.M. Kennis, Klaas J. Hellingwerf, Rienk van Grondelle and Marie Louise Groot

### **Content:**

**Supplementary Scheme 1:** Parallel Kinetic Scheme

**Supplementary Fig.1:** Infrared SADS obtained with the parallel decay model

**Supplementary Fig. 2:** Visible SADS obtained with the parallel decay model

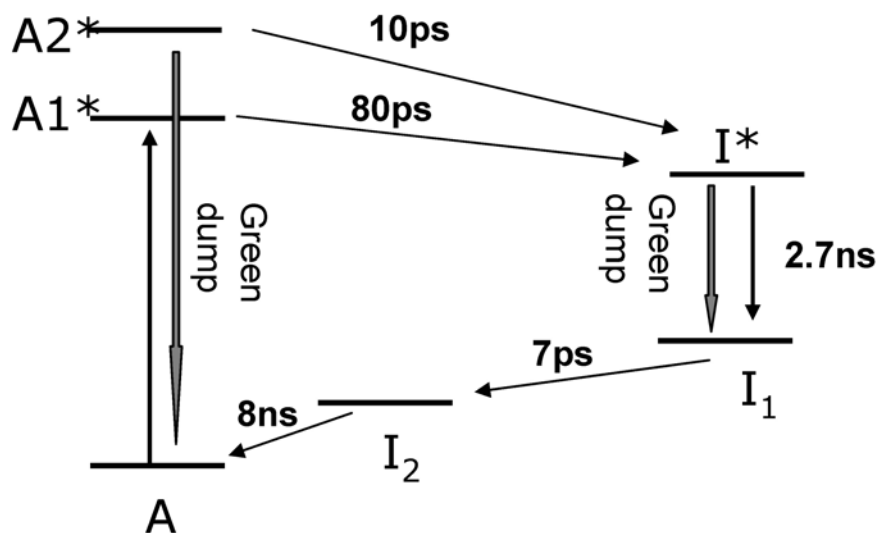

*Supplementary Scheme 1: Parallel Kinetic Scheme*

Kinetic scheme applied to the visible pump-dump-probe and transient infrared data imposing a parallel decay of two A\* components (A\*1 and A\*2) into the I\* compartment. Lifetimes derived from the simultaneous analysis of the infrared data set and the visible pump-dump-probe data (dump pulse applied after 100 ps) are reported.

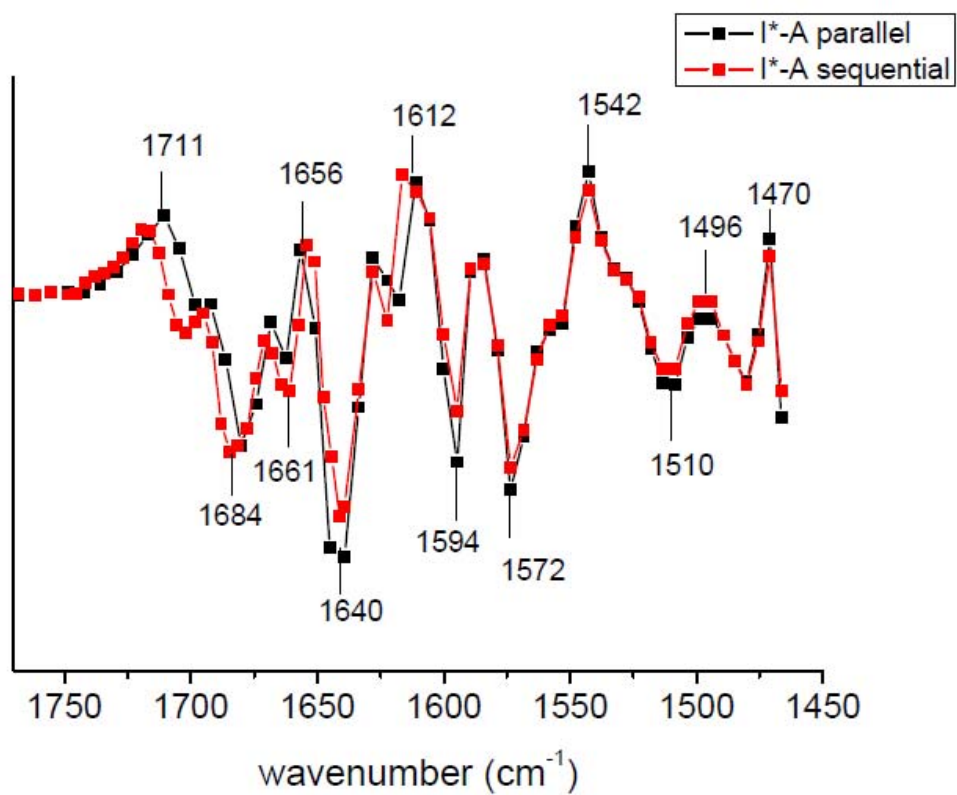

**Supplementary Figure 1: Infrared SADS obtained with the parallel decay model**

Comparison between the SADS representing the I\*-A state obtained by applying the kinetic scheme depicted as Supplementary Scheme 1 to the transient absorption data (black) in the infrared region and the corresponding EADS obtained by applying a sequential model to the data (red).

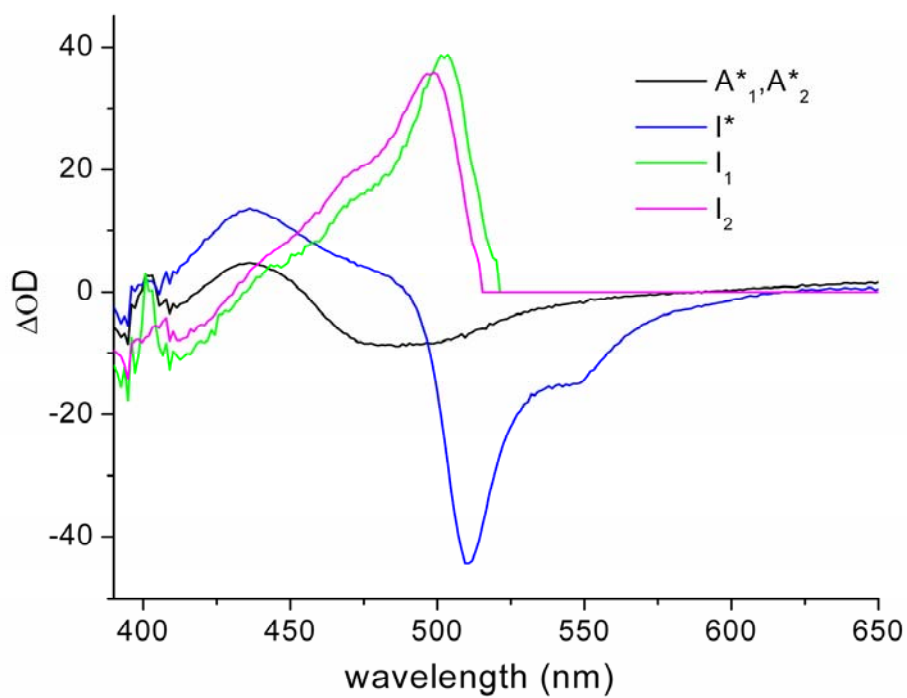

*Supplementary figure 2: Visible SADS obtained with the parallel decay model*

SADS obtained for visible pump-dump-probe data (dataset with dump delay set at 100 ps)

applying a target analysis according to the kinetic scheme depicted as Supplementary Scheme 1.
